# Supplementary material for: Fabrication of Poly Dopamine@poly (Lactic Acid-Co-Glycolic Acid) Nanohybrids for Cancer Therapy via a Triple Collaboration Strategy
Source: MDPI journal article supplement (doi:10.3390/nano13091447), 2023-04-24
Supplement: s1 [file s1]

# Fabrication of Poly Dopamine@poly (Lactic Acid-Co-Glycolic Acid) Nanohybrids for Cancer Therapy via a Triple Collaboration Strategy

Yunhao Li <sup>1,2,†</sup>, Yujuan Gao <sup>3,4,†</sup>, Zian Pan <sup>3,4</sup>, Fan Jia <sup>3,4</sup>, Chenlu Xu <sup>3,4</sup>, Xinyue Cui <sup>3</sup>, Xuan Wang <sup>3,\*</sup> and Yan Wu <sup>3,4,\*</sup>

<sup>1</sup> Department of Medicine, Li Ka Shing Faculty of Medicine, University of Hong Kong, Hong Kong, China; yunhaoli@connect.hku.hk

<sup>2</sup> Department of General Surgery, Peking Union Medical College Hospital, Peking Union Medical College, Chinese Academy of Medical Sciences, Beijing 100730, China

<sup>3</sup> CAS Key Laboratory for Biomedical Effects of Nanomaterials and Nanosafety, National Center for Nanoscience and Technology, No. 11 First North Road, Zhongguancun, Beijing 100190, China; gaoyj20211@nanocr.cn (Y.G.)

<sup>4</sup> University of Chinese Academy of Sciences, Beijing 100049, China

\* Correspondence: wangxuan@nanocr.cn (X.W.); wuy@nanocr.cn (Y.W.)

† These authors contributed equally to this work.

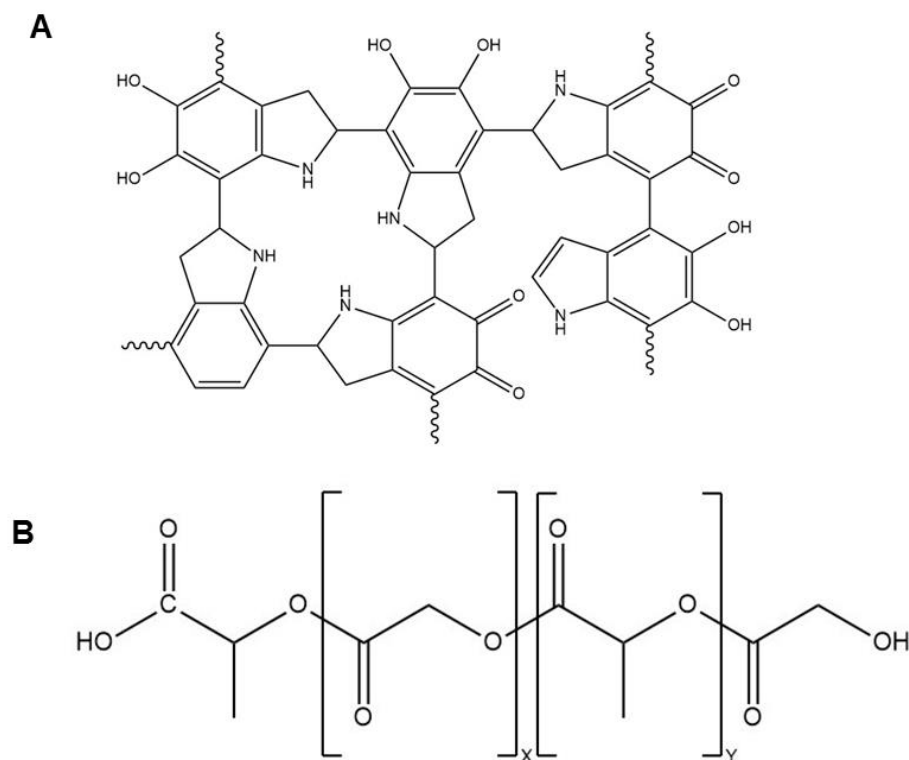

**Figure S1.** The structure PDA (A) and PLGA (B).

**Table S1.** Influence of the mass of DOX on encapsulation efficiency (EE) and loading content (LC) of PDA@PLGA/DC NPs.

| PLGA (mg) | DOX ( $\mu$ g) | EE (%) | LC (%) |
|-----------|----------------|--------|--------|
| 10        | 100            | 0      | 0      |
| 10        | 200            | 0      | 0      |
| 10        | 300            | 33     | 0.99   |
| 10        | 400            | 40     | 1.6    |
| 10        | 500            | 16.5   | 0.83   |

**Table S2.** Influence of the mass of CA4 on encapsulation efficiency (EE) and loading content (LC) of PDA@PLGA/DC NPs.

| PLGA (mg) | CA4 ( $\mu$ g) | EE (%) | LC (%) |
|-----------|----------------|--------|--------|
| 10        | 100            | 41.8   | 0.42   |
| 10        | 200            | 23.4   | 0.47   |
| 10        | 300            | 0      | 0      |
| 10        | 400            | 0      | 0      |
| 10        | 500            | 0      | 0      |

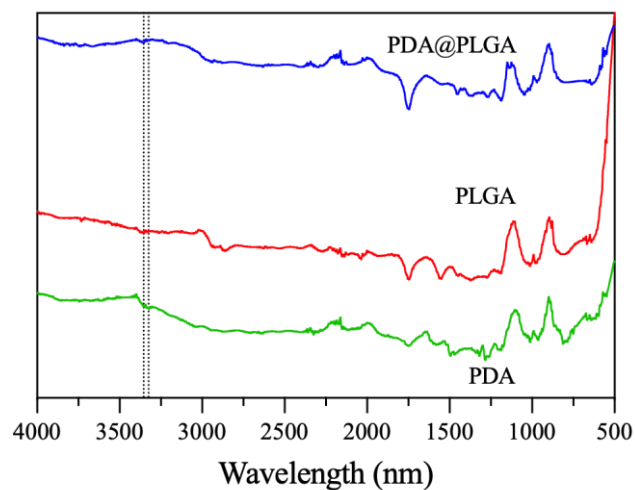

**Figure S2.** FT-IR spectra of PDA@PLGA NPs , PLGA NPs and PDA NPs.

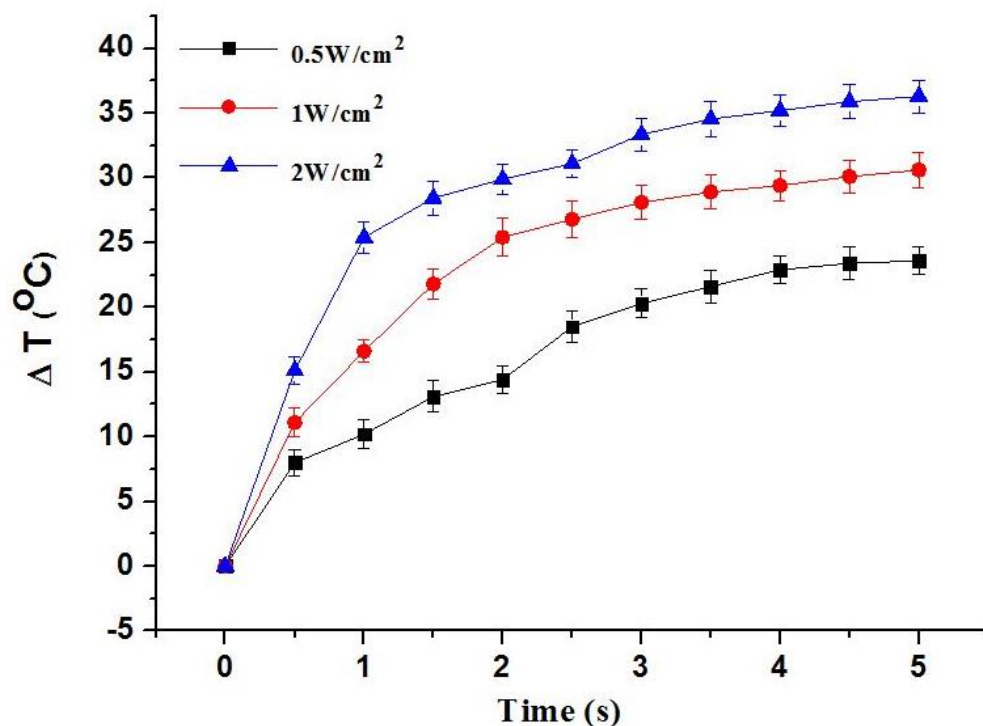

**Figure S3.** Temperature variation curves of PDA@PLGA/DC NPs at various power intensities with the same concentration at 150  $\mu\text{g/mL}$ .

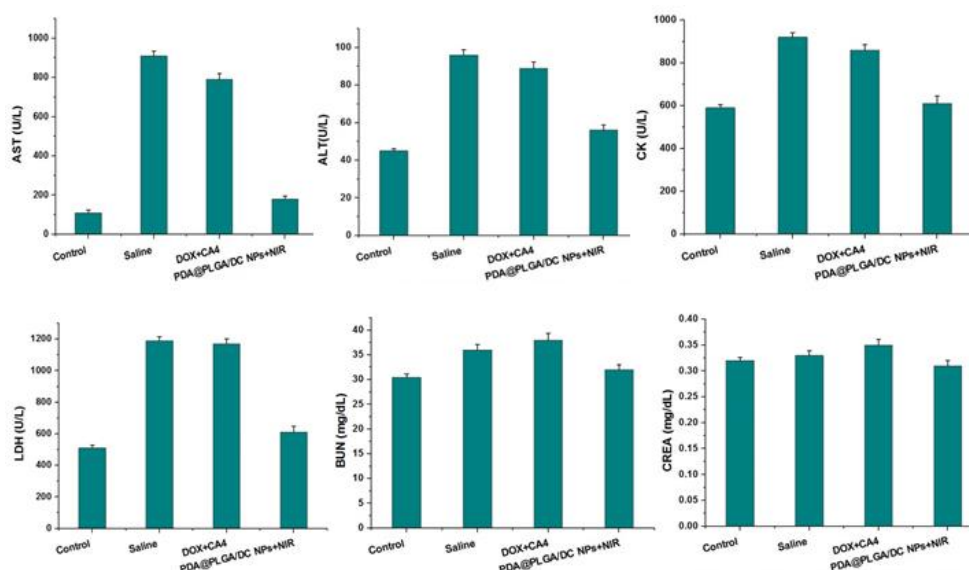

**Figure S4.** Serum biochemical examination of drug-loaded nanoparticles treated mice by saline, free DOX+CA4 and PDA@PLGA/DC NPs+NIR. Normal BALB/c mice served as the control group. Data were presented as mean  $\pm$  SD (n=5). Hepatic function indicators: AST, aspartate transaminase, ALT, alanine aminotransferase; Cardiac function indicators: CK, creatine kinase, LDH, lactate dehydrogenase; Renal function indicators: BUN, blood urea nitrogen, CREA, creatinine.
